# Supplementary material for: Monoclonal Antibody-Based Colorimetric Lateral Flow Immunoassay for the Detection of Pyridaben in the Environment
Source: MDPI journal article supplement (doi:10.3390/bios13050545), 2023-05-13
Supplement: s1 [file s1]

Supporting Information

# Monoclonal Antibody-Based Colorimetric Lateral Flow Immunoassay for the Detection of Pyridaben in the Environment

He Chen <sup>1,2,†</sup>, Hao Liu <sup>3,†</sup>, Yanran Ji <sup>4</sup>, Zekun Sha <sup>4</sup>, Li An <sup>1,2</sup>, Meng Li <sup>1,2</sup>, Di Zhang <sup>1,2</sup>, Xujin Wu <sup>1,2,\*</sup> and Xiude Hua <sup>4,\*</sup>

<sup>1</sup> Institute of Quality Standard and Testing Technology for Agro-Products, Henan Academy of Agricultural Sciences, Zhengzhou 450002, China

<sup>2</sup> Key Laboratory of Grain Quality and Safety and Testing Henan Province, Zhengzhou 450002, China

<sup>3</sup> School of Life Sciences, Henan University, Kaifeng 475004, China

<sup>4</sup> College of Plant Protection, Nanjing Agricultural University, Nanjing 210095, China

\* Correspondence: xujinwu2005@126.com (X.W.); huaxiude@njau.edu.cn (X.H.)

† These authors contributed equally to this work.

**Table S1.** The titers and sensitivities of serums.

| Number of Serum | Titer   | Sensitivity <sup>a</sup> |
|-----------------|---------|--------------------------|
| 1               | 1:32000 | 59.7 %                   |
| 2               | 1:32000 | 66.6%                    |
| 3               | 1:64000 | 67.3%                    |
| 4               | 1:32000 | 77.9%                    |
| 5               | 1:16000 | 75.0%                    |

<sup>a</sup> The sensitivity represents the inhibition ratio of 1 µg mL<sup>-1</sup> pyridaben standard.

**Table S2.** CRs of ic-ELISA for the analogs of pyridaben (*n* = 3).

| Compounds       | Structure                                                                           | IC <sub>50</sub> (ng mL <sup>-1</sup> ) | CR (%) |
|-----------------|-------------------------------------------------------------------------------------|-----------------------------------------|--------|
| Pyridaben       | 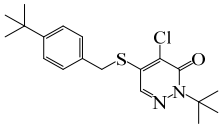 | 3.49                                    | 100    |
| Pyridaphenthion |  | >10000                                  | <0.1   |
| Pymetrozine     |  | >10000                                  | <0.1   |
| Buprofezin      |  | >10000                                  | <0.1   |

---

|              |                                                                                   |        |      |
|--------------|-----------------------------------------------------------------------------------|--------|------|
| Thiamethoxam | 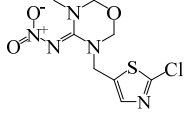 | >10000 | <0.1 |
| Acetamiprid  |  | >10000 | <0.1 |

---

**Table S3.** The detection results of CLFIA with different combinations of coating antigen and AuNP-mAb.

| Coating Antigen (mg mL <sup>-1</sup> ) | AuNP-mAb (μL) | Concentration of Pyridaben (ng mL <sup>-1</sup> ) |    |    |    |
|----------------------------------------|---------------|---------------------------------------------------|----|----|----|
|                                        |               | 0                                                 | 20 | 40 | 80 |
| 1.2                                    | 1             | –                                                 | –  | –  | +  |
|                                        | 2             | –                                                 | –  | –  | +  |
|                                        | 3             | –                                                 | –  | –  | +  |
|                                        | 4             | –                                                 | –  | –  | +  |
|                                        | 5             | –                                                 | –  | –  | +  |
|                                        | 6             | –                                                 | –  | –  | +  |
| 0.6                                    | 1             | +                                                 | +  | +  | +  |
|                                        | 2             | –                                                 | –  | –  | +  |
|                                        | 3             | –                                                 | –  | –  | +  |
|                                        | 4             | –                                                 | –  | –  | +  |
|                                        | 5             | –                                                 | –  | –  | +  |
|                                        | 6             | –                                                 | –  | –  | +  |
| 0.3                                    | 1             | +                                                 | +  | +  | +  |
|                                        | 2             | +                                                 | +  | +  | +  |
|                                        | 3             | +                                                 | +  | +  | +  |
|                                        | 4             | –                                                 | –  | +  | +  |
|                                        | 5             | –                                                 | –  | +  | +  |
|                                        | 6             | –                                                 | –  | +  | +  |
| 0.15                                   | 1             | +                                                 | +  | +  | +  |
|                                        | 2             | +                                                 | +  | +  | +  |
|                                        | 3             | +                                                 | +  | +  | +  |
|                                        | 4             | +                                                 | +  | +  | +  |
|                                        | 5             | +                                                 | +  | +  | +  |
|                                        | 6             | +                                                 | +  | +  | +  |
| 0.075                                  | 1             | +                                                 | +  | +  | +  |
|                                        | 2             | +                                                 | +  | +  | +  |
|                                        | 3             | +                                                 | +  | +  | +  |
|                                        | 4             | +                                                 | +  | +  | +  |
|                                        | 5             | +                                                 | +  | +  | +  |
|                                        | 6             | +                                                 | +  | +  | +  |

Notes: (+) represents positive result and (–) represents negative result.

**Table S4.** The detection results of CLFIA with different concentration of goat anti-mouse IgG.

| Goat Anti-Mouse IgG (mg mL <sup>-1</sup> ) | Concentration of Pyridaben (ng mL <sup>-1</sup> ) |    |    |    |
|--------------------------------------------|---------------------------------------------------|----|----|----|
|                                            | 0                                                 | 20 | 40 | 80 |
| 0.075                                      | –                                                 | –  | –  | –  |
| 0.1                                        | –                                                 | –  | –  | +  |
| 0.125                                      | –                                                 | –  | +  | +  |
| 0.15                                       | +                                                 | +  | +  | +  |
| 0.175                                      | +                                                 | +  | +  | +  |

Notes: (+) represents positive result; (–) represents negative result.

**Table S5.** The optimal parameters of working buffer for the CLFIA.

| Working Buffer      |      | Concentration of Pyridaben (ng mL <sup>-1</sup> ) |     |   |    |    |
|---------------------|------|---------------------------------------------------|-----|---|----|----|
|                     |      | 0                                                 | 2.5 | 5 | 10 | 20 |
| Tween-20 (%)        | 0.05 | –                                                 | –   | – | –  | –  |
|                     | 0.1  | –                                                 | –   | – | –  | +  |
|                     | 0.2  | –                                                 | –   | – | –  | +  |
|                     | 0.4  | –                                                 | –   | – | +  | +  |
|                     | 0.8  | –                                                 | –   | – | +  | +  |
|                     | 1.6  | +                                                 | +   | + | +  | +  |
| Na <sup>+</sup> (M) | 0.07 | –                                                 | –   | – | –  | –  |
|                     | 0.14 | –                                                 | –   | – | +  | +  |
|                     | 0.28 | –                                                 | –   | – | +  | +  |
|                     | 0.56 | –                                                 | –   | – | +  | +  |
|                     | 1.12 | +                                                 | +   | + | +  | +  |
| pH                  | 5    | –                                                 | –   | – | –  | +  |
|                     | 6    | –                                                 | –   | – | –  | +  |
|                     | 7.4  | –                                                 | –   | – | +  | +  |
|                     | 8    | –                                                 | –   | – | +  | +  |
|                     | 9    | –                                                 | –   | – | +  | +  |
| PEG 20000 (%)       | 0.05 | –                                                 | –   | – | +  | +  |
|                     | 0.1  | –                                                 | –   | – | +  | +  |
|                     | 0.2  | –                                                 | –   | + | +  | +  |
|                     | 0.4  | –                                                 | –   | + | +  | +  |
|                     | 0.8  | –                                                 | –   | + | +  | +  |
| Methanol (%)        | 5    | –                                                 | –   | – | +  | +  |
|                     | 10   | –                                                 | –   | – | +  | +  |
|                     | 15   | –                                                 | –   | – | +  | +  |
|                     | 20   | –                                                 | –   | – | –  | +  |
|                     | 25   | –                                                 | –   | – | –  | +  |
| Acetonitrile (%)    | 5    | –                                                 | –   | + | +  | +  |
|                     | 10   | –                                                 | –   | + | +  | +  |
|                     | 15   | –                                                 | –   | + | +  | +  |
|                     | 20   | –                                                 | –   | + | +  | +  |
|                     | 25   | +                                                 | +   | + | +  | +  |
| Acetone (%)         | 5    | –                                                 | –   | – | +  | +  |
|                     | 10   | –                                                 | –   | – | +  | +  |
|                     | 15   | –                                                 | –   | – | +  | +  |
|                     | 20   | –                                                 | –   | – | +  | +  |
|                     | 25   | –                                                 | –   | – | –  | +  |

Notes: “+” represents positive detection result and “–” represents negative detection result.

**Table S6.** Comparison of the proposed CLFIA with other previous immunoassays for pyridaben detection.

| Methods | Probes | LOD (ng mL <sup>-1</sup> ) | Response Time (min) | Step | Signal Readout                  | Ref       |
|---------|--------|----------------------------|---------------------|------|---------------------------------|-----------|
| ELISA   | HRP    | —                          | 495 <sup>a</sup>    | 6    | Absorption at 405 nm            | [26]      |
| LFIA    | AuNPs  | 25                         | 10                  | 1    | Signal intensity of T-line only | [27]      |
| CLFIA   | AuNPs  | 5                          | 10                  | 1    | Signal intensity of T/C-line    | This work |

Notes: “—” represents the data not shown; <sup>a</sup> the incubation for overnight was replaced by incubation for 2 h.

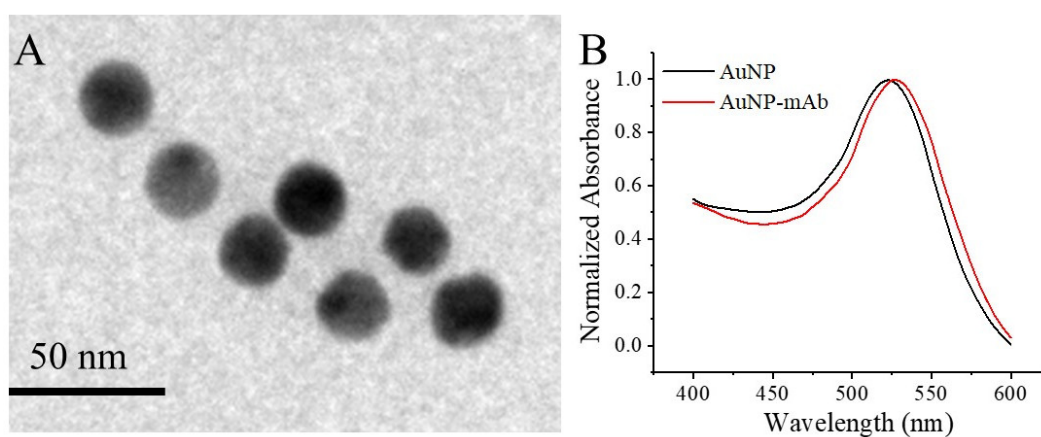

**Figure S1.** The TEM image of AuNPs (A) and UV-vis spectrums of AuNPs and AuNP-mAb (B).

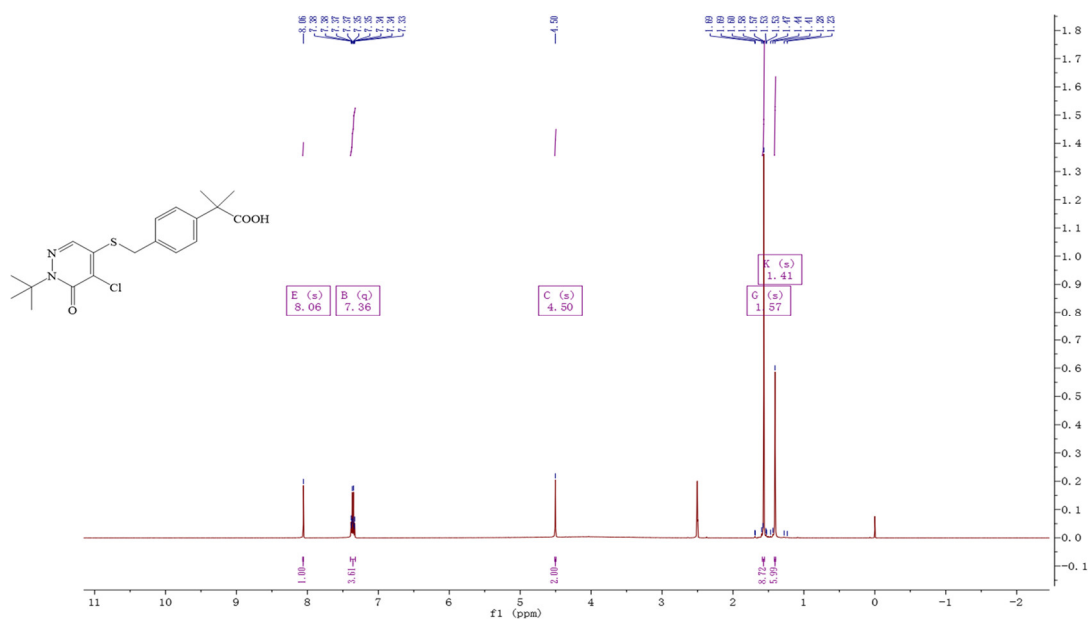

**Figure S2.** The <sup>1</sup>H NMR for pyridaben hapten.

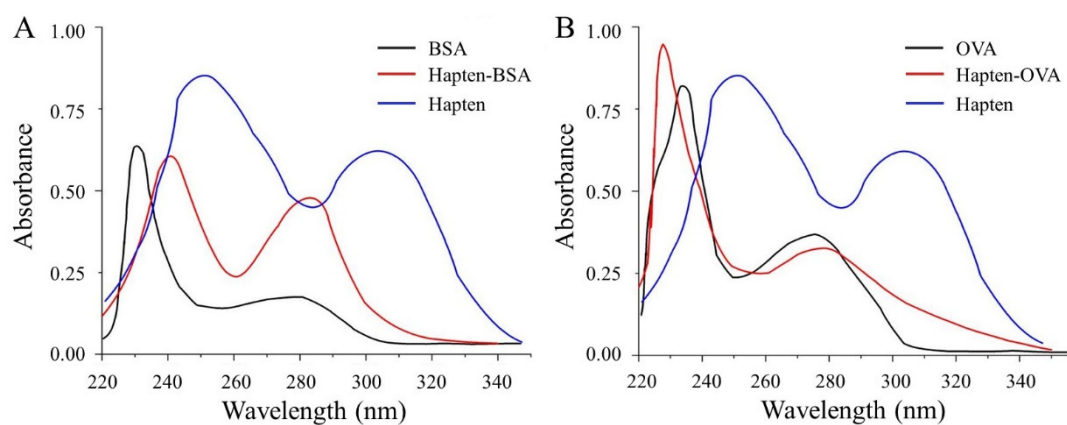

**Figure S3.** The UV spectra of hapten, carrier proteins and their conjugates.

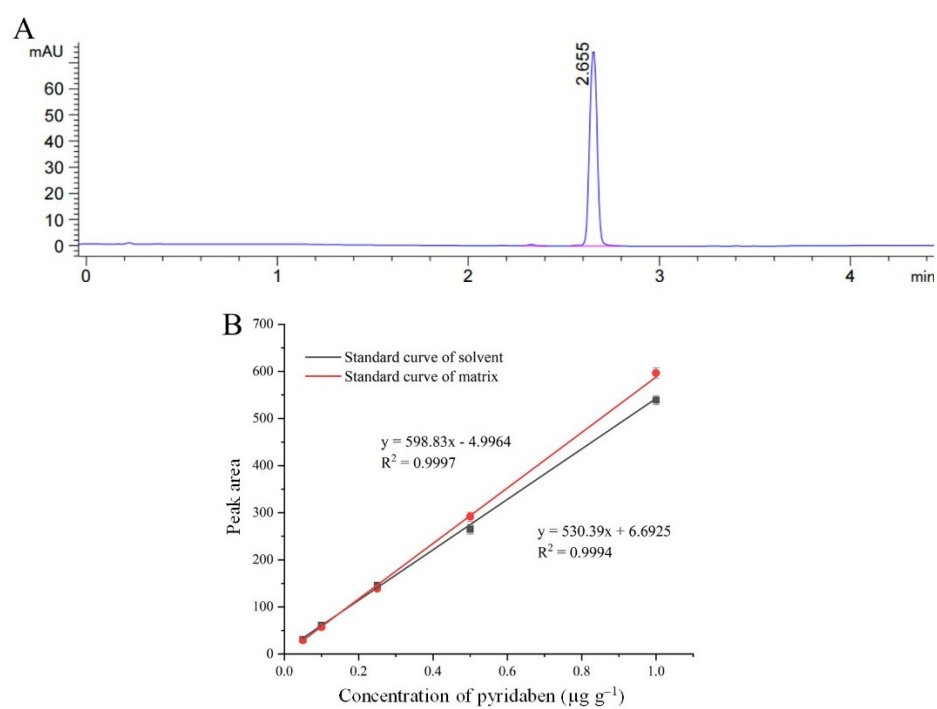

**Figure S4.** Chromatogram of pyridaben (A) and standard curves in matrix (B).
